# Supplementary material for: Genome-wide identification and expression analysis of the ERF transcription factor family in pineapple ( Ananas comosus (L.) Merr.)
Source: PeerJ journal article supplement (doi:10.7717/peerj.10014), 2020-09-22
Supplement: Figure_S1.pdf [file Figure_S1.pdf]

|          | 1     | 10     | 20    | 30    | 40        | 50              |               |               |        |        |      |      |      |     |     |     |     |     |      |     |     |   |     |     |   |     |     |     |     |   |   |   |   |  |  |
|----------|-------|--------|-------|-------|-----------|-----------------|---------------|---------------|--------|--------|------|------|------|-----|-----|-----|-----|-----|------|-----|-----|---|-----|-----|---|-----|-----|-----|-----|---|---|---|---|--|--|
| AcoERF1  | CE    | YRGVRR | QRTWG | .K    | WVAEIREP  | RK. . . . . RTR | .I            | WLGSTFA       | TAE    | EAA    | LAYD | EAA  | RR   | LYG | .PD | A   | FLN | L   | P    |     |     |   |     |     |   |     |     |     |     |   |   |   |   |  |  |
| AcoERF2  | RK    | FRGVRR | RPWG  | .K    | YAAEIRD   | PARG            | . . . . . VR  | .V            | WLGTFD | TAE    | EAA  | VYD  | SAA  | LQ  | LRG | .PR | A   | ATN | F    | S   |     |   |     |     |   |     |     |     |     |   |   |   |   |  |  |
| AcoERF3  | VR    | FRGVRR | RPWG  | .K    | RWAAEIRD  | PARR            | . . . . . RR  | .R            | .V     | WLGTFD | TAE  | EAA  | AYD  | SAA | V   | MRG | .PR | A   | VTN  | F   | Y   |   |     |     |   |     |     |     |     |   |   |   |   |  |  |
| AcoERF4  | SE    | YLGVR  | RPWG  | .K    | RYAAEIR   | NPYTK           | . . . . . ER  | .H            | WLGTFD | TAE    | EAA  | VAYD | VTA  | I   | S   | F   | S   | G   | PAR  | A   | R   | T | N   | F   | Y |     |     |     |     |   |   |   |   |  |  |
| AcoERF5  | KL    | YRGVRR | QRTWG | .K    | WVAEIRL   | PRN             | . . . . . RTR | .L            | WLGTFD | TAE    | EAA  | LAYD | RAA  | F   | R   | L   | R   | G   | .DS  | A   | R   | L | N   | F   | P |     |     |     |     |   |   |   |   |  |  |
| AcoERF6  | . .   | YRGVRR | QRTWG | .K    | KWAAEIRD  | PRRA            | . . . . . VR  | .K            | WLGTFD | TAE    | EAA  | LAYD | RAA  | I   | E   | F   | R   | G   | .PR  | A   | R   | L | N   | F   | P |     |     |     |     |   |   |   |   |  |  |
| AcoERF7  | CL    | YRGVRR | QRTWG | .K    | WVAEIREP  | NR              | . . . . . GSR | .L            | WLGTFD | TAE    | EAA  | RAYD | EAA  | R   | A   | M   | Y   | G   | .SL  | A   | R   | V | N   | F   | E |     |     |     |     |   |   |   |   |  |  |
| AcoERF8  | TO    | YRGVRR | QRTWG | .K    | KWAAEIRD  | PGRK            | . . . . . VR  | .V            | .V     | WLGTFD | TAE  | EAA  | RAYD | RAA | R   | R   | I   | R   | G    | .KK | A   | K | L   | N   | F | P   |     |     |     |   |   |   |   |  |  |
| AcoERF9  | GR    | FLGVRR | RPWG  | .K    | RYAAEIRD  | PTTK            | . . . . . ER  | .H            | WLGTFD | TAE    | EAA  | LAYD | RAA  | L   | S   | M   | K   | G   | .TO  | A   | R   | T | N   | F   | M |     |     |     |     |   |   |   |   |  |  |
| AcoERF10 | GR    | FLGVRR | RPWG  | .K    | RYAAEIRD  | PTTK            | . . . . . ER  | .H            | WLGTFD | TAE    | EAA  | LAYD | RAA  | L   | S   | M   | K   | G   | .TO  | A   | R   | T | N   | F   | M |     |     |     |     |   |   |   |   |  |  |
| AcoERF11 | . .   | YRGVRR | QRTWG | .K    | SWVSEIR   | APNQ            | . . . . . KTR | .I            | WLGSTF | TAE    | EAA  | RAYD | AAL  | L   | C   | L   | K   | G   | .ASS | A   | S   | A | S   | L   | N |     |     |     |     |   |   |   |   |  |  |
| AcoERF12 | . .   | YRGVRR | QRTWG | .K    | KWAAEIRD  | PRRA            | . . . . . AR  | .K            | WLGTFD | TAE    | EAA  | RAYD | LAA  | I   | E   | F   | R   | G   | .AR  | A   | R   | L | N   | F   | P |     |     |     |     |   |   |   |   |  |  |
| AcoERF13 | KL    | YRGVRR | QRTWG | .K    | WVAEIRL   | PRN             | . . . . . RTR | .L            | WLGTFD | TAE    | EAA  | LAYD | RAA  | I   | E   | F   | R   | G   | .DF  | A   | R   | L | N   | F   | P |     |     |     |     |   |   |   |   |  |  |
| AcoERF14 | RR    | YRGVRR | QRTWG | .K    | KWAAEIRD  | PHKA            | . . . . . AR  | .V            | WLGTFD | TAE    | EAA  | RAYD | EAA  | L   | R   | F   | R   | G   | .SR  | A   | K   | L | N   | F   | P |     |     |     |     |   |   |   |   |  |  |
| AcoERF15 | TO    | YRGVRR | QRTWG | .K    | KWVSEIREP | PKG             | . . . . . KTR | .I            | WLGSTF | E      | SAE  | M    | A    | A   | A   | H   | D   | V   | A    | A   | L   | R | L   | R   | G | .RE | . . | A   | R   | L | N |   |   |  |  |
| AcoERF16 | SR    | YRGVRR | QRTWG | .K    | KWAAEIRD  | PRKG            | . . . . . VR  | .V            | WLGTFD | TAE    | EAA  | RAYD | VEA  | R   | R   | I   | R   | G   | .KK  | A   | R   | V | N   | F   | P |     |     |     |     |   |   |   |   |  |  |
| AcoERF17 | VH    | FRGVRR | RPWG  | .K    | RFAAEIRD  | PWKK            | . . . . . TR  | .K            | WLGTFD | TAE    | EAA  | RAYD | EAA  | R   | N   | L   | R   | G   | .PK  | A   | K   | T | N   | F   | G |     |     |     |     |   |   |   |   |  |  |
| AcoERF18 | KR    | YVGVRR | QRTWG | .K    | RWVAEIKD  | TVQ             | . . . . . KIR | .L            | WLGTFD | TAE    | EAA  | RAYD | EAA  | C   | L   | L   | R   | G   | .AN  | T   | R   | T | N   | F   | W |     |     |     |     |   |   |   |   |  |  |
| AcoERF19 | RH    | YRGVRR | QRTWG | .K    | KYAAEIRD  | SERHG           | . . . . . AR  | .V            | WLGTFD | TAE    | EAA  | AYD  | RAA  | F   | R   | M   | R   | G   | .AR  | A   | L   | L | X   | W   | G |     |     |     |     |   |   |   |   |  |  |
| AcoERF20 | SN    | YKGVRR | QRTWG | .K    | KFAAEIRD  | LSRRG           | . . . . . AR  | .V            | WLGTFD | TAE    | EAA  | LAFD | VAA  | L   | R   | M   | R   | G   | .PR  | T   | R   | L | N   | F   | P |     |     |     |     |   |   |   |   |  |  |
| AcoERF21 | KL    | YRGVRR | QRTWG | .K    | KWVAEIRL  | PQN             | . . . . . RVR | .V            | WLGTYR | PA     | K    | P    | N    | P   | K   | P   | N   | T   | N    | P   | N   | P | S   | K   | D | .PP | A   | N   | D   | S | N |   |   |  |  |
| AcoERF22 | PS    | YRGVRR | QRTWG | .K    | KWVSEIREP | PKG             | . . . . . KTR | .I            | WLGTFD | TAE    | EAA  | RAYD | AAL  | C   | V   | K   | G   | .PA | . .  | A   | A   | L | N   |     |   |     |     |     |     |   |   |   |   |  |  |
| AcoERF23 | RK    | FRGVRR | RPWG  | .K    | KYAAEIRD  | PVRG            | . . . . . VR  | .V            | WLGTFD | TAE    | EAA  | VYD  | SAA  | L   | Q   | LRG | .PR | A   | T    | N   | F   | S |     |     |   |     |     |     |     |   |   |   |   |  |  |
| AcoERF24 | VR    | YRGVRR | QRTWG | .K    | RFAAEIRD  | PAKK            | . . . . . SR  | .S            | WLGTFD | TAE    | EAA  | RAYD | AAL  | Q   | F   | R   | G   | .PK | A    | K   | T   | N | F   | A   |   |     |     |     |     |   |   |   |   |  |  |
| AcoERF25 | SA    | YRGVRR | QRTWG | .K    | RWVAEIRD  | PIR             | . . . . . RVR | .S            | WLGTYG | SAE    | EAA  | EY   | RAA  | A   | E   | R   | F   | RA  | .EQ  | K   | I   | G | . . |     |   |     |     |     |     |   |   |   |   |  |  |
| AcoERF26 | RP    | YIGVRR | QRTWG | .K    | KFAAEIRDS | ARGG            | . . . . . ER  | .V            | WLGTFE | SAE    | EAA  | LAYD | QAA  | Y   | A   | V   | R   | G   | .AA  | A   | V   | L | N   | F   | P |     |     |     |     |   |   |   |   |  |  |
| AcoERF27 | KL    | YRGVRR | QRTWG | .K    | KWVAEIRL  | PRS             | . . . . . RSR | .L            | WLGTFD | TAE    | EAA  | LAYD | REA  | F   | K   | L   | R   | G   | .ES  | A   | R   | L | N   | F   | P |     |     |     |     |   |   |   |   |  |  |
| AcoERF28 | VR    | YRGVRR | QRTWG | .K    | RYAAEIRD  | PAKR            | . . . . . RR  | .R            | WLGTFD | TAE    | EAA  | RAYD | AAL  | R   | F   | R   | G   | .PK | A    | K   | T   | N | F   | P   |   |     |     |     |     |   |   |   |   |  |  |
| AcoERF29 | PV    | YKGVRR | QRTWG | .K    | RWVCEVRE  | PNNP            | PGGGARS       | NAR           | .I     | WLGTFD | TAE  | EAA  | RAHD | VAA | L   | A   | L   | R   | G    | .RA | . . | A | C   | L   | N |     |     |     |     |   |   |   |   |  |  |
| AcoERF30 | VH    | YRGVRR | QRTWG | .K    | RYAAEIRD  | PWKK            | . . . . . TR  | .K            | WLGTFD | TAE    | EAA  | LAYD | HAA  | R   | S   | L   | R   | G   | .DK  | A   | K   | T | N   | F   | P |     |     |     |     |   |   |   |   |  |  |
| AcoERF31 | NO    | YRGVRR | QRTWG | .K    | KWAAEIRD  | PRKG            | . . . . . VR  | .V            | WLGTFD | TAE    | EAA  | RAYD | VEA  | R   | R   | I   | R   | G   | .KK  | A   | K   | V | N   | F   | P |     |     |     |     |   |   |   |   |  |  |
| AcoERF32 | PS    | YRGVRR | QRTWG | .K    | KWVSEIREP | PKG             | . . . . . KTR | .I            | WLGTFD | TAE    | EAA  | RAHD | VAA  | L   | C   | V   | K   | G   | .PA  | . . | A   | A | L   | N   |   |     |     |     |     |   |   |   |   |  |  |
| AcoERF33 | GR    | YRGVRR | QRTWG | .K    | KWVSEIREP | PKG             | . . . . . KSR | .L            | WLGTFD | TAE    | EAA  | RAHD | VAA  | L   | C   | V   | K   | G   | .AA  | A   | R   | L | R   | V   | K |     |     |     |     |   |   |   |   |  |  |
| AcoERF34 | CP    | YRGVRR | QRTWG | .K    | KWVAEIREP | PNR             | . . . . . GAR | .L            | WLGTFD | TAE    | EAA  | QAYD | SAA  | R   | N   | L   | Y   | G   | .DC  | A   | R   | L | N   | L   | N |     |     |     |     |   |   |   |   |  |  |
| AcoERF35 | RS    | YRGVRR | QRTWG | .K    | KFAAEIRDS | TRHG            | . . . . . VR  | .V            | WLGTFD | SAE    | EAA  | MAYD | QAA  | F   | M   | R   | G   | .PA | A    | V   | L   | N | F   | P   |   |     |     |     |     |   |   |   |   |  |  |
| AcoERF36 | VH    | YRGVRR | QRTWG | .K    | RYAAEIRD  | PAKR            | . . . . . SR  | .S            | WLGTFD | TAE    | EAA  | RAYD | AAL  | E   | F   | R   | G   | .PK | A    | K   | T   | N | F   | P   |   |     |     |     |     |   |   |   |   |  |  |
| AcoERF37 | RS    | YIGVRR | QRTWG | .K    | KFAAEIRDS | TRNG            | . . . . . AR  | .V            | WLGTFD | TAE    | EAA  | LAYD | QAA  | L   | S   | V   | R   | G   | .AA  | V   | L   | N | F   | S   |   |     |     |     |     |   |   |   |   |  |  |
| AcoERF38 | . . . | GARR   | RGR   | . .   | VRGGD     | TRLE            | PP            | . . . . . WGP | .H     | GLGTFD | TAE  | EAA  | RAYD | RAA | F   | A   | M   | R   | G    | .HL | A   | V | L   | N   | F | P   |     |     |     |   |   |   |   |  |  |
| AcoERF39 | PR    | FRGVRR | RPWG  | .K    | KYAAEIRD  | PWRR            | . . . . . ICR | .E            | WLGTYN | TAE    | EAA  | KVYD | SAA  | I   | Q   | L   | R   | G   | .PH  | A   | T   | T | N   | F   | S |     |     |     |     |   |   |   |   |  |  |
| AcoERF40 | PK    | YKGVRR | QRTWG | .K    | RWAAEIRN  | PVS             | . . . . . GCR | .E            | WLGTFD | NAA    | EAA  | AAAY | QSA  | A   | K   | Q   | F   | K   | A    | .KR | S   | R | N   | . . | A |     |     |     |     |   |   |   |   |  |  |
| AcoERF41 | KH    | YRGVRR | QRTWG | .K    | KYAAEIRD  | PARNG           | . . . . . AR  | .V            | WLGTFE | TAE    | EAA  | LAYD | RAA  | Y   | M   | R   | G   | .SR | A    | L   | L   | N | F   | P   |   |     |     |     |     |   |   |   |   |  |  |
| AcoERF42 | NO    | YRGVRR | QRTWG | .K    | KWAAEIRD  | PRKG            | . . . . . VR  | .V            | WLGTYN | TAE    | EAA  | RAYD | VEA  | R   | R   | I   | R   | G   | .KK  | A   | K   | V | N   | F   | P |     |     |     |     |   |   |   |   |  |  |
| AcoERF43 | RL    | FRGVRR | RPWG  | .K    | TWVSEIR   | PRS             | . . . . . QSR | .I            | WLGSTF | D      | H    | P    | E    | K   | A   | A   | R   | A   | Y    | D   | A   | V | Y   | C   | L | R   | G   | .AA | . . | G | N | F | N |  |  |
| AcoERF44 | KR    | FRGVRR | RPWG  | .K    | RWAAEIRD  | PTQR            | . . . . . KR  | .V            | WLGTFD | TAE    | EAA  | TAYD | SAA  | I   | R   | L   | K   | G   | .PN  | A   | V   | T | N   | F   | P |     |     |     |     |   |   |   |   |  |  |
| AcoERF45 | PV    | YRGVRR | QRTWG | .K    | KWVSEIREP | PKG             | . . . . . KSR | .L            | WLGTFD | TAE    | EAA  | RAHD | VAA  | L   | T   | I   | K   | G   | .QS  | . . | A   | H | L   | N   |   |     |     |     |     |   |   |   |   |  |  |
| AcoERF46 | RR    | YRGVRR | QRTWG | .K    | KFAAEIRD  | PNRRG           | . . . . . SR  | .S            | WLGTFD | TAE    | EAA  | RAYD | RAA  | F   | K   | M   | R   | G   | .CK  | A   | T   | L | N   | F   | P |     |     |     |     |   |   |   |   |  |  |
| AcoERF47 | KH    | YRGVRR | QRTWG | .K    | KFAAEIRD  | PAKNG           | . . . . . AR  | .V            | WLGTFD | TAE    | EAA  | LAYD | RAA  | Y   | M   | R   | G   | .SR | A    | L   | L   | N | F   | P   |   |     |     |     |     |   |   |   |   |  |  |
| AcoERF48 | KK    | F      | IGVRR | QRTWG | .K        | RWVCEVRE        | PKG           | . . . . . KVR | .L     | WLGTFD | TAE  | EAA  | RAYD | DAA | R   | S   | L   | R   | G    | .AN | A   | R | T   | N   | F | G   |     |     |     |   |   |   |   |  |  |
| AcoERF49 | PV    | YKGVRR | QRTWG | .K    | RWVCEVRE  | PKG             | . . . . . KSR | .L            | WLGTFD | TAE    | EAA  | RAHD | VAA  | L   | A   | L   | R   | G   | .AS  | . . | A   | P | L   | N   |   |     |     |     |     |   |   |   |   |  |  |
| AcoERF50 | RR    | F      | GVRR  | QRTWG | .K        | RWVCEVRE        | PKG           | . . . . . RVR | .L     | WLGTFD | TAE  | EAA  | RAYD | DAA | R   | T   | L   | R   | G    | .TN | A   | R | T   | N   | F | N   |     |     |     |   |   |   |   |  |  |
| AcoERF51 | KK    | FRGVRR | RPWG  | .K    | SWVSEIR   | HP              | LL            | . . . . . KRR | .V     | WLGTFE | TAE  | EAA  | RAYD | EAA | V   | L   | M   | S   | G    | .RN | A   | K | T   | N   | F | P   |     |     |     |   |   |   |   |  |  |
| AcoERF52 | PA    | YRGVRR | QRTWG | .K    | KWVSEIREP | PKG             | . . . . . KSR | .L            | WLGTFD | TAE    | EAA  | RAHD | VAA  | R   | A   | V   | K   | G   | .AA  | . . | A   | V | L   | N   |   |     |     |     |     |   |   |   |   |  |  |
| AcoERF53 | MR    | YLGVR  | RPWG  | .K    | RYAAEIRD  | PA              | TK            | . . . . . ER  | .H     | WLGTFD | TAE  | EAA  | VAYD | RAA | R   | S   | L   | R   | G    | .PR | A   | R | T   | N   | F | A   |     |     |     |   |   |   |   |  |  |
| AcoERF54 | KH    | YRGVRR | QRTWG | .K    | KWAAEIRD  | PNKA            | . . . . . AR  | .V            | WLGTFD | TAE    | EAA  | MAYD | EAA  | L   | R   | F   | K   | G   | .SK  | A   | K   | V | N   | F   | P |     |     |     |     |   |   |   |   |  |  |
| AcoERF55 | KL    | YRGVRR | QRTWG | .K    | KWVAEIRL  | PRN             | . . . . . RTR | .L            | WLGTFD | TAE    | EAA  | LAYD | REA  | F   | K   | L   | R   | G   | .EN  | A   | R   | L | N   | F   | P |     |     |     |     |   |   |   |   |  |  |
| AcoERF56 | PV    | YRGVRR | QRTWG | .K    | RWVCEVRE  | PKG             | . . . . . KSR | .L            | WLGTYP | TAE    | EAA  | RAHD | VAA  | L   | A   | L   | R   | G   | .EA  | . . | A   | P | L   | N   |   |     |     |     |     |   |   |   |   |  |  |
| AcoERF57 | RG    | YRGVRR | QRTWG | .K    | RWVCEVRE  | PKG             | . . . . . CR  | .H            | WLGTYD | TAE    | EAA  | RAYD | EAA  | R   | G   | M   | R   | G   | .SK  | A   | R   | T | N   | F   | A |     |     |     |     |   |   |   |   |  |  |
| AcoERF58 | TK    | F      | GVRR  | QRTWG | .K        | RWVCEVRE        | PKG           | . . . . . KIR | .M     | WLGTFE | TAE  | EAA  | RAYD | EAA | R   | I   | M   | G   | .PR  | A   | R   | T | N   | F   | A |     |     |     |     |   |   |   |   |  |  |
| AcoERF59 | AR    | YLGVR  | RPWG  | .K    | RYAAEIRD  | PA              | TK            | . . . . . DR  | .H     | WLGTYD | TAE  | EAA  | VAYD | RAA | R   | A   | L   | R   | G    | .PR | A   | R | T   | N   | F | A   |     |     |     |   |   |   |   |  |  |
| AcoERF60 | RH    | YRGVRR | QRTWG | .K    | KWAAEIRD  | PKKA            | . . . . . AR  | .V            | WLGTFD | TAE    | EAA  | IAYD | EAA  | L   | R   | F   | K   | G   | .TK  | A   | K   | L | N   | F   | P |     |     |     |     |   |   |   |   |  |  |
| AcoERF61 | ER    | YRGVRR | QRTWG | .K    | RFAAEIRD  | PRRRG           | . . . . . GSR | .L            | WLGTFD | SAA    | VAA  | RAYD | RAA  | F   | M   | R   | G   | .AK | A    | I   | L   | N | F   | P   |   |     |     |     |     |   |   |   |   |  |  |
| AcoERF62 | KK    | YKGVRR | QRTWG | .K    | KWVSEIR   | VP              | GT            | . . . . . RHR | .L     | WLGSTF | Y    | A    | E    | A   | A   | V   | A   | H   | D    | A   | A   | V | F   | F   | R | G   | .PD | A   | A   | E | G | F | N |  |  |
| AcoERF63 | RR    | YRGVRR | QRTWG | .K    | KWAAEIRD  | PHKA            | . . . . . AR  | .V            | WLGTFD | TAE    | EAA  | RAYD | EAA  | L   | R   | F   | R   | G   | .SR  | A   | K   | L | N   | F   | P |     |     |     |     |   |   |   |   |  |  |
| AcoERF64 | RR    | YKGVRR | QRTWG | .K    | KFVSEIRL  | PN              | S             | . . . . . RNR | .I     | WLGSTF | D    | T    |      |     |     |     |     |     |      |     |     |   |     |     |   |     |     |     |     |   |   |   |   |  |  |
