# Supplementary material for: Genome-wide identification and expression analysis of the ERF transcription factor family in pineapple ( Ananas comosus (L.) Merr.)
Source: PeerJ journal article supplement (doi:10.7717/peerj.10014), 2020-09-22

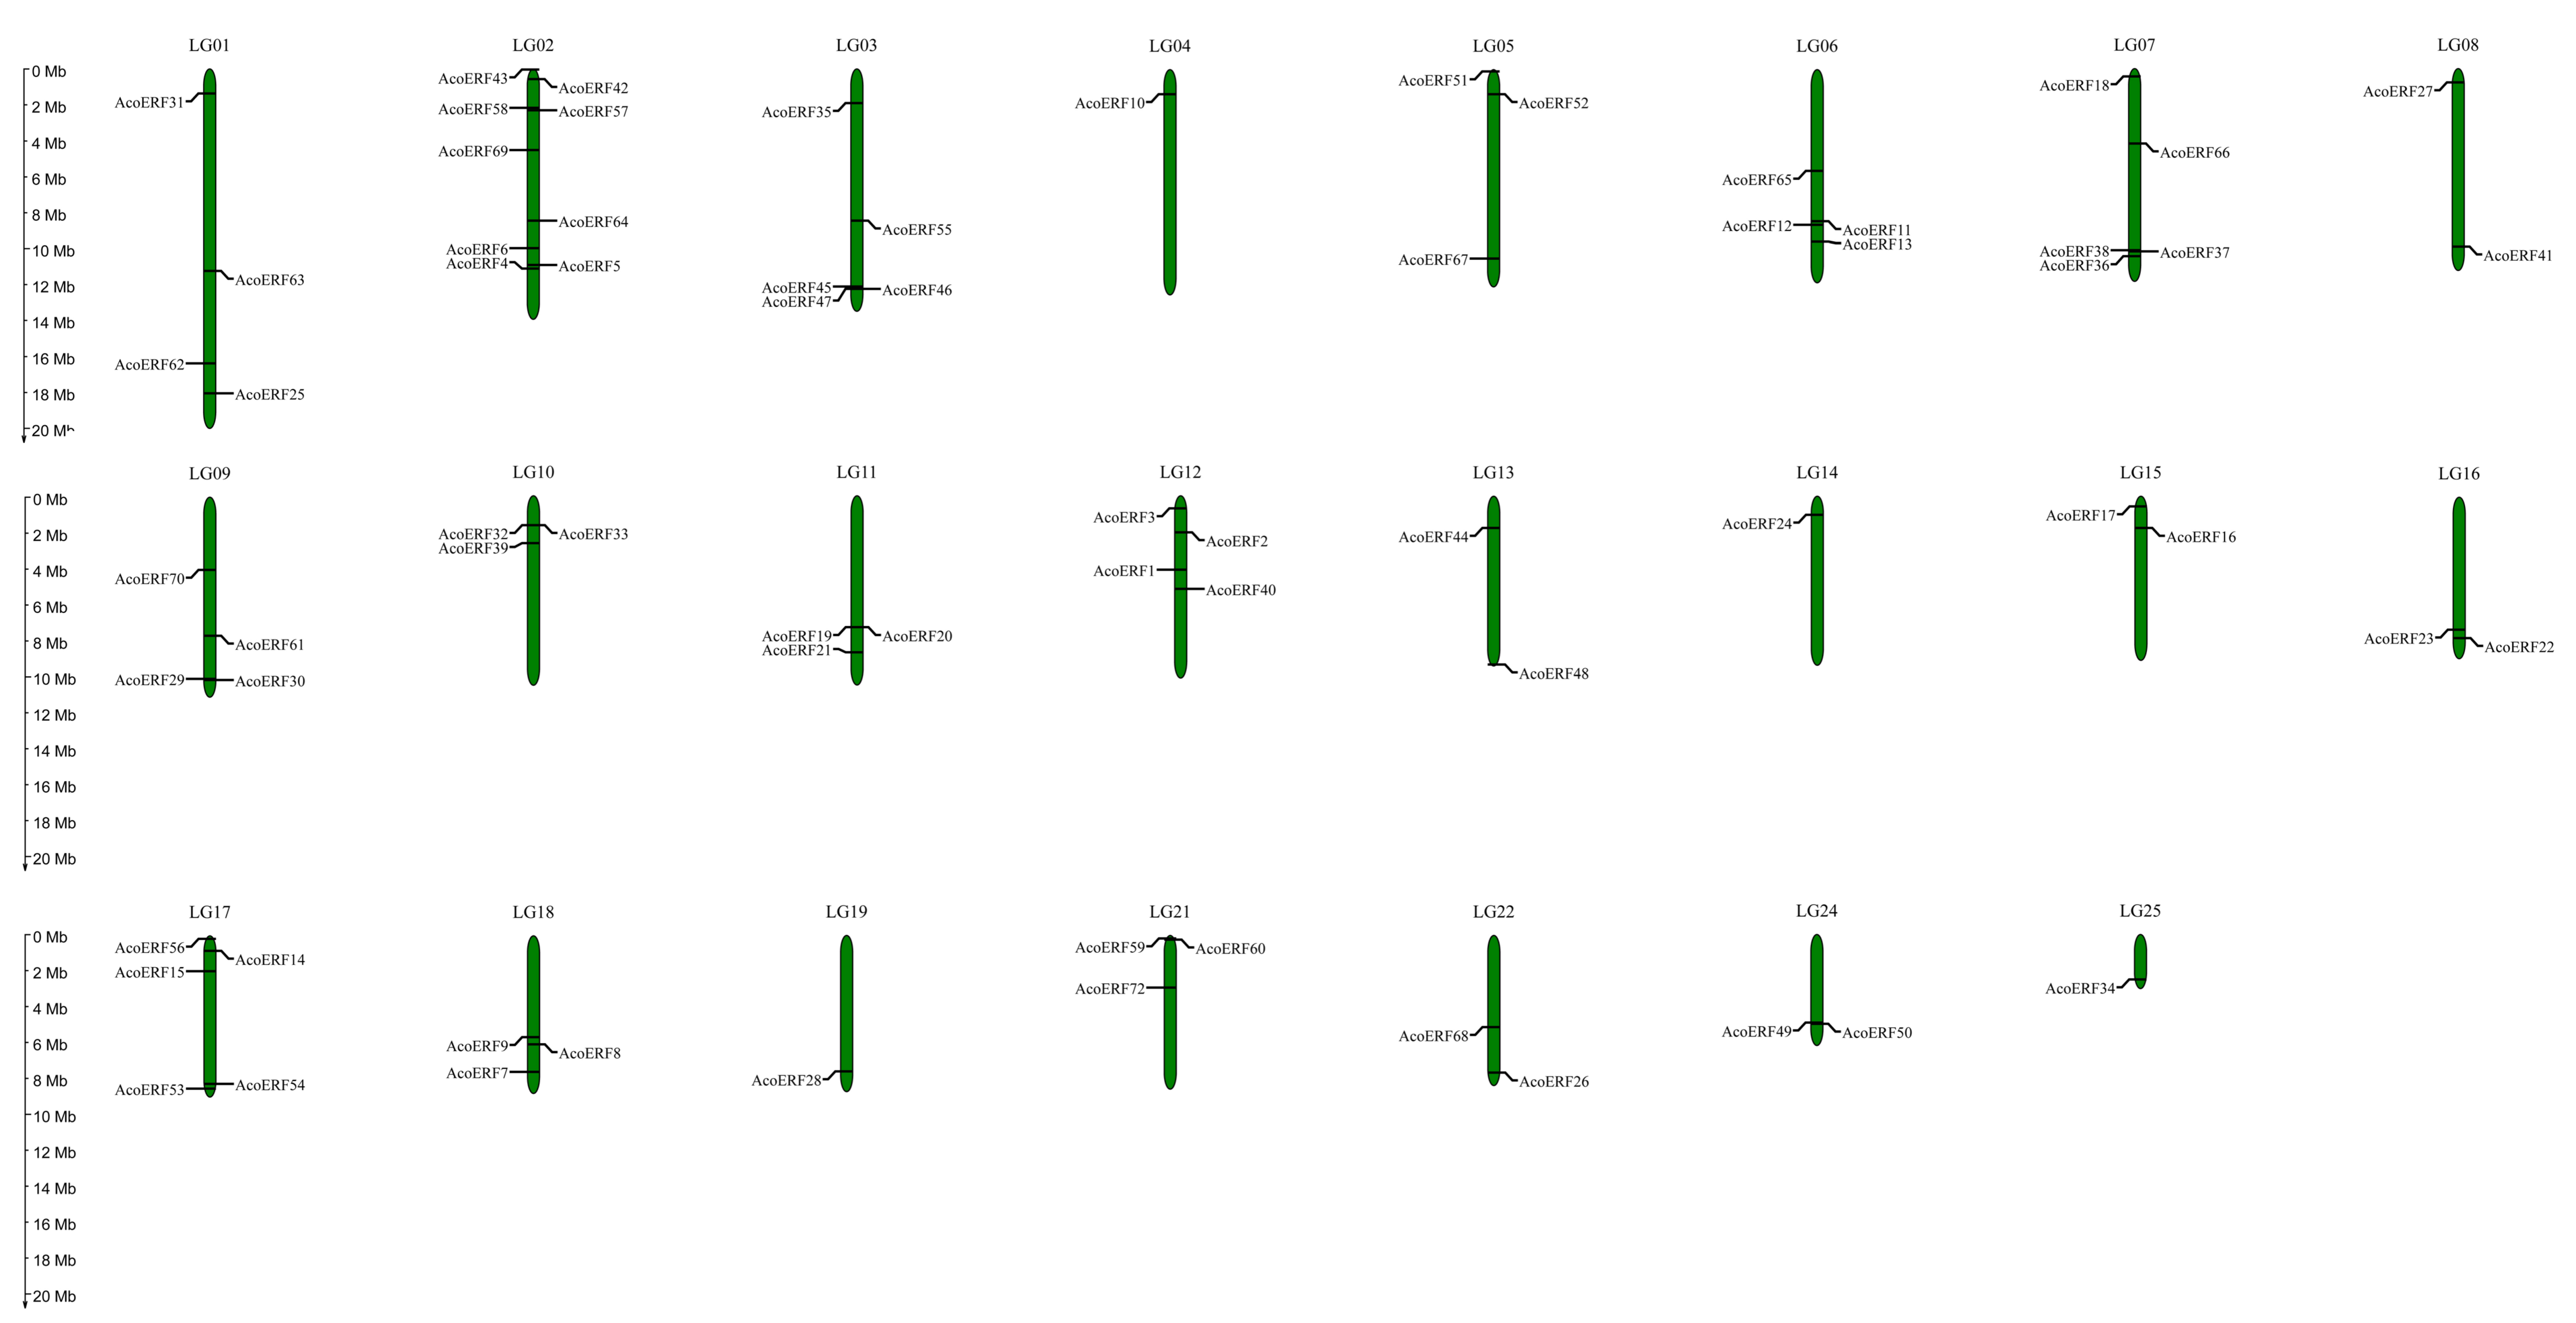

Supplement: Figure_S3.pdf [file Figure_S3.pdf]
