# Supplementary material for: Genome-wide identification and expression analysis of the ERF transcription factor family in pineapple (Ananas comosus (L.) Merr.)
Source: PeerJ. 2020 Sep 22;8:e10014. doi: 10.7717/peerj.10014 (PMC7518161; doi:10.7717/peerj.10014)
Supplement: Supplemental Information 4 [file peerj-08-10014-s004.xlsx]

## Sheet: Sheet1
Table S1. Primers used in this article
Gene name	Forward Primer Sequence (5’-3’)	Reverse Primer Sequence (5’-3’)
AcoERF7	GAAGCTGCTAGGGCTATGTATG	GATTCATGCTGGGACGTAGTT
AcoERF13	AGTGAGGAGCTCATGAAAGC	GGAGAAGGTGAAGGTGAGTAAG
AcoERF16	GTGGATGTGGATGTGGATGT	CTCTTCTGGCTGGCTAGTTTAG
AcoERF36	GAAGAGGAGCAGGGTGTG	GAAATTGGTCTTGGCCTTGG
AcoERF42	AGGAAGCGGAAGAACCAATAC	GCCTTTGCGAGGATCTCTTAT
AcoERF45	CGTCGTTGTCATCCTCTAACTC	CTGTTCTTACCGCCCTTCTTTA
AcoERF60	CTCCTCCTACCCTGACCTAATC	GCTGCTTCCACTGGTGTATAA
AcoERF65	GTTGAAGAGGAAGAGCCCATTA	CCGGAGTCTTAACATCGTTCTC
AcoERF67	CGTCTACCCGATAAACCCTAAC	GTTCTTCGGTAAGCTCCTCTTC
