# Supplementary material for: Genome-wide identification and expression analysis of the ERF transcription factor family in pineapple (Ananas comosus (L.) Merr.)
Source: PeerJ. 2020 Sep 22;8:e10014. doi: 10.7717/peerj.10014 (PMC7518161; doi:10.7717/peerj.10014)
Supplement: Supplemental Information 5 [file peerj-08-10014-s005.xlsx]

## Sheet: Sheet1
Table S2. Characteristics of ERFs in pineapple
Gene ID	Gene Name	CDS length (bp)	Amino acid	MW (kDa)	pI	Chromosome	Locus	GO ID
Aco000059	AcoERF1	948	315	33.75	4.91	LG12	5065638-5067899	GO:0006355, GO:0003700
Aco000347	AcoERF2	447	148	15.69	11.23	LG12	2543312-2543758	GO:0006355, GO:0003700
Aco000576	AcoERF3	570	189	20.22	10.82	LG12	877881-885128	GO:0006355, GO:0003700
Aco001157	AcoERF4	435	144	16.1	6.84	LG02	13784860-13785294	GO:0006355, GO:0003700
Aco001190	AcoERF5	906	301	33.08	5.66	LG02	13530546-13531451	GO:0006355, GO:0003700
Aco001318	AcoERF6	648	215	23.75	6.11	LG02	12402716-12403708	GO:0006355, GO:0003700
Aco001600	AcoERF7	1026	341	38.15	5.05	LG18	9400576-9404316	GO:0006355, GO:0003700
Aco001844	AcoERF8	798	265	29.32	6.26	LG18	7470842- 7472399	GO:0006355, GO:0003700
Aco001898	AcoERF9	1038	345	38.44	6.05	LG18	7008034-7472399	GO:0006355, GO:0003700
Aco002425	AcoERF10	984	327	35.72	6.07	LG04	1688566-1689549	GO:0006355, GO:0003700
Aco002673	AcoERF11	651	216	22.93	5.22	LG06	10539056-10539706	GO:0006355, GO:0003700
Aco002699	AcoERF12	687	228	25.26	8.54	LG06	10778997-10779683	GO:0006355, GO:0003700
Aco002824	AcoERF13	1098	365	38.92	5.63	LG06	11885237-11886334	GO:0006355, GO:0003700
Aco003196	AcoERF14	1110	369	39.43	6.43	LG17	1034914-1036596	GO:0006355, GO:0003700
Aco003376	AcoERF15	495	164	18.21	5.79	LG17	2435249-2435743	GO:0006355, GO:0003700
Aco003993	AcoERF16	1257	418	46.41	5.02	LG15	2174798-2177280	GO:0006355, GO:0003700
Aco004208	AcoERF17	1819	605	66.74	10.25	LG15	683324-689862
Aco004886	AcoERF18	1230	409	44.37	4.71	LG07	535141-536370	GO:0006355, GO:0003700
Aco005324	AcoERF19	408	135	14.48	10.65	LG11	9109823-9110230	GO:0006355, GO:0003700
Aco005327	AcoERF20	777	258	28.57	8.15	LG11	9119487-9120263	GO:0006355, GO:0003700
Aco005509	AcoERF21	759	252	26.79	9.33	LG11	10852777-10853535	GO:0006355, GO:0003700
Aco006004	AcoERF22	474	157	16.41	9.68	LG16	9780663-9781136	GO:0006355, GO:0003700
Aco006074	AcoERF23	927	308	33.33	5.42	LG16	9146330-9147431	GO:0006355, GO:0003700
Aco006567	AcoERF24	663	220	22.9	11.61	LG14	1314823-1315485	GO:0006355, GO:0003700
Aco006716	AcoERF25	699	232	25.88	4.94	LG01	22455511-22456209	GO:0006355, GO:0003700
Aco006883	AcoERF26	570	189	20.33	5.17	LG22	9491004-9491573	GO:0006355, GO:0003700
Aco007650	AcoERF27	1122	373	40.04	9.07	LG08	962022-963979	GO:0006355, GO:0003700
Aco008323	AcoERF28	477	158	17.12	9.07	LG19	9461349-9461825	GO:0006355, GO:0003700
Aco008968	AcoERF29	684	227	24.13	6.9	LG09	12532806-12533489	GO:0006355, GO:0003700
Aco008998	AcoERF30	342	113	12.75	11.64	LG09	12682650-12682991	GO:0006355, GO:0003700
Aco009511	AcoERF31	1131	376	42.56	4.76	LG01	1667019-1669442	GO:0006355, GO:0003700
Aco009985	AcoERF32	474	157	16.41	9.68	LG10	1992629-1993102	GO:0006355, GO:0003700
Aco009986	AcoERF33	834	277	28.59	11.25	LG10	1995886-2001576	GO:0006355, GO:0003700
Aco010173	AcoERF34	663	220	24.21	5.24	LG25	3102765-3103427	GO:0006355, GO:0003700
Aco010430	AcoERF35	651	216	23.84	6.55	LG03	2341116-2341766	GO:0006355, GO:0003700
Aco010545	AcoERF36	318	105	11.21	10.46	LG07	13023056-13023373	GO:0006355, GO:0003700
Aco010600	AcoERF37	714	237	25.78	4.85	LG07	12637230-12637943	GO:0006355, GO:0003700
Aco010602	AcoERF38	417	138	14.71	9.76	LG07	12595714-12596130	GO:0006355, GO:0003700
Aco010738	AcoERF39	1059	352	38.02	5.97	LG10	3236737-3237795	GO:0006355, GO:0003700
Aco010908	AcoERF40	528	175	20.16	6.16	LG12	6395531-6396443	GO:0006355, GO:0003700
Aco011669	AcoERF41	849	282	29.2	6.2	LG08	12341412-12342278	GO:0006355, GO:0003700
Aco012157	AcoERF42	1047	348	38.79	4.88	LG02	737778-741580	GO:0006355, GO:0003700
Aco012243	AcoERF43	450	149	16.32	9.63	LG02	73387-74171	GO:0006355, GO:0003700
Aco012562	AcoERF44	885	294	32.46	9.29	LG13	2191826-2192710	GO:0006355, GO:0003700
Aco012835	AcoERF45	1029	342	36.71	8.68	LG03	15051238-15052266	GO:0006355, GO:0003700
Aco012858	AcoERF46	897	298	32.64	5.45	LG03	15238605-15239501	GO:0006355, GO:0003700
Aco012860	AcoERF47	948	315	32.63	9.16	LG03	15260268-15261215	GO:0006355, GO:0003700
Aco013629	AcoERF48	837	278	28.78	6.85	LG13	11655614-11656450	GO:0006355, GO:0003700
Aco013781	AcoERF49	1536	511	54.13	8.56	LG24	6060807-6064926	GO:0006355, GO:0003700
Aco013795	AcoERF50	735	244	26.24	10.16	LG24	6205335-6206069	GO:0006355, GO:0003700
Aco014268	AcoERF51	666	221	24.12	8.56	LG05	128578-129975	GO:0006355, GO:0003700
Aco015162	AcoERF52	786	261	27.64	4.71	LG05	1705173-1705958	GO:0006355, GO:0003700
Aco016197	AcoERF53	873	290	30.83	5.41	LG17	10585734-10586606	GO:0006355, GO:0003700
Aco016213	AcoERF54	741	246	26.82	6.51	LG17	10286208-10295232	GO:0006355, GO:0003700
Aco016346	AcoERF55	1392	463	49.31	5.56	LG03	10461754-10463145	GO:0006355, GO:0003700
Aco016696	AcoERF56	717	238	26.1	7.66	LG17	191641-192357	GO:0006355, GO:0003700
Aco016891	AcoERF57	699	232	24.89	9.89	LG02	2874045-2874743	GO:0006355, GO:0003700
Aco016902	AcoERF58	555	184	19.63	9.62	LG02	2676776-2677360	GO:0006355, GO:0003700
Aco017794	AcoERF59	870	289	31.3	5.62	LG21	213297-214166	GO:0006355, GO:0003700
Aco017803	AcoERF60	735	244	25.4	7.99	LG21	311192-312956	GO:0006355, GO:0003700
Aco017940	AcoERF61	711	236	25.64	9.49	LG09	9608307-9609017	GO:0006355, GO:0003700
Aco018023	AcoERF62	522	173	19.02	5.81	LG01	20359723-20360244	GO:0006355, GO:0003700
Aco018224	AcoERF63	1347	448	47.09	9.41	LG01	13965614-13968274	GO:0006355, GO:0003700
Aco018980	AcoERF64	546	181	19	9.65	LG02	10499315-10499860	GO:0006355, GO:0003700
Aco021063	AcoERF65	1107	368	41.23	4.8	LG06	6999225-7003227	GO:0006355, GO:0003700
Aco021629	AcoERF66	924	307	33.69	5.86	LG07	5212145-5213068	GO:0006355, GO:0003700
Aco022052	AcoERF67	810	269	28.79	5.57	LG05	13072071-13072880	GO:0006355, GO:0003700
Aco022517	AcoERF68	750	249	25.95	4.98	LG22	6333171-6333920	GO:0006355, GO:0003700
Aco022651	AcoERF69	429	142	16.98	4.94	LG02	5582144-5582918	GO:0003700
Aco023605	AcoERF70	867	288	32.02	6.66	LG09	5040760-5041626	GO:0006355, GO:0003700
Aco024332	AcoERF71	735	244	25.59	5.91	scaffold_502	94305-95039	GO:0006355, GO:0003700
Aco026785	AcoERF72	1074	357	38.25	9.11	LG21	3649639-3650955	GO:0006355, GO:0003700
Aco029929	AcoERF73	1086	361	38.51	9.11	scaffold_892	8303-9631	GO:0006355, GO:0003700
Aco031075	AcoERF74	540	179	19.87	9.62	scaffold_1345	32264-32803	GO:0006355, GO:0003700
