# Supplementary material for: Genome-wide identification and expression analysis of the ERF transcription factor family in pineapple (Ananas comosus (L.) Merr.)
Source: PeerJ. 2020 Sep 22;8:e10014. doi: 10.7717/peerj.10014 (PMC7518161; doi:10.7717/peerj.10014)
Supplement: Supplemental Information 6 [file peerj-08-10014-s006.xlsx]

## Sheet: Sheet1
Table S3. Synteny blocks of ERF genes within pineapple genome
gene ID		gene name
gene1（pineapple）	gene2（pineapple）	gene1	gene2	Ka	Ks	Ka/Ks
Aco002824	Aco001190	AcoERF13	AcoERF5	0.2845	0.7373	0.385867
Aco003993	Aco009511	AcoERF16	AcoERF31	0.3027	1.1553	0.26201
Aco003993	Aco021063	AcoERF16	AcoERF65	0.3822	2.4595	0.155397
Aco005324	Aco010430	AcoERF19	AcoERF35	0.3505	1.4601	0.240052
Aco006004	Aco009985	AcoERF22	AcoERF32	0	0	0
Aco006004	Aco016696	AcoERF22	AcoERF56	0.4942	2.4863	0.198769
Aco006883	Aco010430	AcoERF26	AcoERF35	0.3527	4.2539	0.0829122
Aco008998	Aco010545	AcoERF30	AcoERF36	0.2377	1.2899	0.184278
Aco009511	Aco021063	AcoERF31	AcoERF65	0.3503	1.7287	0.202638
Aco009985	Aco016696	AcoERF32	AcoERF56	0.4942	2.4863	0.198769
Aco011669	Aco012860	AcoERF41	AcoERF47	0.2298	0.7538	0.304855
Aco012858	Aco017940	AcoERF46	AcoERF61	0.4301	1.7013	0.252807
Aco016197	Aco017794	AcoERF53	AcoERF59	0.4927	1.1397	0.432307
Aco016213	Aco031075	AcoERF54	AcoERF74	0.0543	0.0597	0.909548
Aco017803	Aco031075	AcoERF60	AcoERF74	0.5641	1.4968	0.376871
Aco026785	Aco029929	AcoERF72	AcoERF73	0	0.0039	0
