# Supplementary material for: Genome-wide identification and expression analysis of the ERF transcription factor family in pineapple (Ananas comosus (L.) Merr.)
Source: PeerJ. 2020 Sep 22;8:e10014. doi: 10.7717/peerj.10014 (PMC7518161; doi:10.7717/peerj.10014)
Supplement: Supplemental Information 7 [file peerj-08-10014-s007.xlsx]

## Sheet: Sheet1
Table S4. Synteny blocks of ERF genes between pineapple and Arabidopsis genomes
gene ID		gene name
gene1(pineapple)	gene2(Arabidopsis)	gene1	gene2	Ka	Ks	Ka/Ks
Aco006004	AT1G01250	AcoERF22	AtERF023	0.5378	3.6219	0.148486
Aco009985	AT1G01250	AcoERF32	AtERF023	0.5378	3.6219	0.148486
Aco014268	AT1G15360	AcoERF51	AtERF001	0.2662	3.5411	0.0751744
Aco002824	AT1G22190	AcoERF13	AtERF058	0.4703	3.4942	0.134594
Aco001190	AT1G22190	AcoERF5	AtERF058	0.4089	3.8079	0.107382
Aco018023	AT1G22810	AcoERF62	AtERF019	0.5907	3.5135	0.168123
Aco003376	AT1G33760	AcoERF15	AtERF022	0.5081	3.5679	0.142409
Aco006004	AT1G33760	AcoERF22	AtERF022	0.4822	3.4244	0.140813
Aco009985	AT1G33760	AcoERF32	AtERF022	0.4822	3.4244	0.140813
Aco006004	AT1G63030	AcoERF22	AtERF032	0.6991	3.442	0.203109
Aco009985	AT1G63030	AcoERF32	AtERF032	0.6991	3.442	0.203109
Aco018023	AT1G71520	AcoERF62	AtERF020	0.5124	3.3918	0.15107
Aco018023	AT2G23340	AcoERF62	AtERF008	0.6925	3.5075	0.197434
Aco015162	AT3G16280	AcoERF52	AtERF036	0.5979	3.9028	0.153198
Aco010545	AT3G23230	AcoERF36	AtERF098	0.6159	3.3351	0.184672
Aco010602	AT3G23230	AcoERF38	AtERF098	0.5498	3.4471	0.159496
Aco006883	AT3G23240	AcoERF26	AtERF092	0.4359	3.6167	0.120524
Aco012860	AT4G17500	AcoERF47	AtERF100	0.4825	3.0719	0.157069
Aco006004	AT4G25470	AcoERF22	AtERF030	0.6358	3.5521	0.178993
Aco009985	AT4G25470	AcoERF32	AtERF030	0.6358	3.5521	0.178993
Aco006004	AT4G25480	AcoERF22	AtERF031	0.5882	3.5928	0.163716
Aco009985	AT4G25480	AcoERF32	AtERF031	0.5882	3.5928	0.163716
Aco012243	AT4G31060	AcoERF43	AtERF015	0.6616	3.2701	0.202318
Aco001318	AT4G34410	AcoERF6	AtERF109	0.5846	3.795	0.154045
Aco014268	AT5G11190	AcoERF51	AtERF004	0.3436	3.5827	0.0959053
Aco006004	AT5G11590	AcoERF22	AtERF041	0.4778	3.582	0.133389
Aco009985	AT5G11590	AcoERF32	AtERF041	0.4778	3.582	0.133389
Aco015162	AT5G11590	AcoERF52	AtERF041	0.4521	3.0053	0.150434
Aco017803	AT5G13330	AcoERF60	AtERF113	0.6998	2.3116	0.302734
Aco014268	AT5G25390	AcoERF51	AtERF005	0.3358	3.5464	0.0946876
Aco015162	AT5G25810	AcoERF52	AtERF040	0.4774	3.7847	0.126139
Aco017803	AT5G50080	AcoERF60	AtERF110	0.7133	2.6769	0.266465
Aco006004	AT5G51990	AcoERF22	AtERF028	0.6425	3.5927	0.178835
Aco009985	AT5G51990	AcoERF32	AtERF028	0.6425	3.5927	0.178835
Aco006004	AT5G52020	AcoERF22	AtERF025	0.6342	3.6639	0.173094
Aco009985	AT5G52020	AcoERF32	AtERF025	0.6342	3.6639	0.173094
Aco003376	AT5G67190	AcoERF15	AtERF010	0.7731	3.4642	0.223168
