# Supplementary material for: Genome-wide identification and expression analysis of the ERF transcription factor family in pineapple (Ananas comosus (L.) Merr.)
Source: PeerJ. 2020 Sep 22;8:e10014. doi: 10.7717/peerj.10014 (PMC7518161; doi:10.7717/peerj.10014)
Supplement: Supplemental Information 9 [file peerj-08-10014-s009.xlsx]

## Sheet: Sheet1
Table S6. The expression profiles of the AcoERFs in different tissues
gene name	Ovule.S1	Ovule.S2	Ovule.S3	Ovule.S4	Ovule.S5	Ovule.S6	Ovule.S7	Sepal.S1	Sepal.S2	Sepal.S3	Sepal.S4	Stamen.S1	Stamen.S2	Stamen.S3	Stamen.S4	Stamen.S5	Petal.S1	Petal.S2	Petal.S3	Fruit.S1	Fruit.S2	Fruit.S3	Fruit.S4	Fruit.S5	Fruit.S6	Root	Flower	Leaf
AcoERF1	0	0	0	0	0	0	0	0	0	0	0	0	0.0986537	0	0	0	0.087373	0	0	0	0	0	0	0	0	0	0	0
AcoERF2	1.68222	2.24236	2.50573	0.693672	1.40657	4.7297	2.86864	3.50611	1.97938	3.08468	3.02415	3.01889	3.65919	2.36009	1.75028	1.90592	2.44954	1.94357	0	1.93812	10.22	14.5655	10.9429	9.61189	6.00766	1.89234	1.33097	3.36236
AcoERF3	33.6072	33.7102	30.0504	25.4392	33.3097	29.0665	62.3209	31.3116	44.1831	20.3337	19.745	18.0626	20.6719	21.0749	23.1755	19.8414	16.7737	15.1736	2.89853	12.0137	21.1191	22.4171	30.4229	23.8149	38.0137	8.92024	4.20503	10.7344
AcoERF4	0	0	0	0	0	0	0	0	0	0	0	0	0	0	0	0	0	0	0	0	0	0	0	0	0	0.330209	0	0
AcoERF5	19.3986	20.3059	18.4288	22.8658	17.0404	19.3205	21.5014	41.21	40.1296	36.6654	37.3765	9.82934	9.11789	15.3338	11.9989	28.5361	15.881	14.1818	125.606	50.8364	157.322	217.009	116.915	98.649	157.614	191.057	36.677	44.3253
AcoERF6	2.5174	0.0533669	0	0.194143	0.194412	0	0	24.2727	24.4289	0	1.25487	0	0	0	0.0513744	0.128317	1.84251	10.3947	0.227488	0	0	0.349879	0.123025	0.183368	0.868452	2.43249	0.140926	0
AcoERF7	6.48738	10.3577	9.68345	9.38982	9.50739	20.0846	10.649	14.275	9.55777	16.4498	16.1758	9.83284	14.3497	59.1331	25.6737	25.9111	8.55974	12.2247	31.9481	27.6685	8.88451	10.2199	6.90848	4.89012	17.1951	49.8729	26.0842	29.1433
AcoERF8	4.75143	5.63881	4.62925	2.83609	3.88518	2.62715	2.39627	6.3909	3.7246	2.34209	1.20837	1.8378	0.675247	0.873838	0.993056	0.219059	1.10185	0.447012	5.49423	0	0.345376	0.756915	0.706586	1.59056	0.343328	8.74902	2.42215	2.46893
AcoERF9	0.443073	0.240035	0	0	0	0	0	0	0	0	0	0.211477	0.0971341	0	0.0364273	0.0260621	0	0	0	0	0	0	0	0	0	0.0852075	0	0
AcoERF10	0	0	0	0	0	0	0	0	0	0	0	0	0	0.544264	1.18309	0	0	0	0	0	0	0	0	0	0	0.133395	0	0
AcoERF11	0.639994	1.50478	1.89335	0	1.20962	0.247167	10.7159	75.7526	19.8996	20.376	48.2738	4.89861	14.2087	13.3674	2.28109	1.80056	5.10609	2.60957	1.16057	0.253195	0.508085	0.918608	2.32785	13.041	1.37767	1.95544	0.841246	0.231458
AcoERF12	5.80038	2.13805	0.31086	2.04529	1.40856	0.318596	0.275902	18.4601	15.5657	0.601295	13.9233	0.213288	0	0	0.245948	0.349531	1.56655	20.2793	7.86584	0	0.142934	0.157012	0	0	0.452848	14.6207	0.634764	0.21998
AcoERF13	244.68	255.203	218.569	246.097	206.04	137.445	218.707	366.166	257.461	215.401	202.087	132.884	100.819	145.534	159.226	43.879	185.965	174.322	211.442	49.5534	208.792	205.61	148.368	128.51	169.311	87.9251	92.8305	99.1141
AcoERF14	0.109907	0.344374	0.102204	0.205735	0	0.421827	0.0805934	1.63058	16.5492	13.8323	1.33882	0	0.0331579	0.24981	0.222564	0.0255148	0	5.44142	359.597	0.351097	0	0.0930795	0.792166	0.0974278	0.147669	0.315897	56.029	64.8108
AcoERF15	0	0.389929	1.03118	0.211217	0.42773	0	5.60784	3.4649	1.79193	3.91463	8.77294	2.02768	2.39451	4.22959	0.703548	0.0574522	0.876387	0.351754	0.47017	0	0	0	4.43858	5.96825	3.55985	0.150592	0.382926	0
AcoERF16	173.435	134.766	114.01	125.68	112.174	135.963	96.3613	99.5688	101.828	101.413	95.3423	87.6538	70.5774	54.7638	60.3747	222.321	63.0475	69.4088	303.377	240.822	258.584	287.172	217.885	266.694	334.405	142.789	89.5813	88.1186
AcoERF17	7.83834	4.8386	3.08134	7.4058	4.81091	3.31013	3.41645	33.8256	21.0787	6.67402	11.4367	8.96477	6.87657	5.54071	3.96008	0.405118	4.15848	3.21124	2.80283	0.864015	4.91218	8.00358	4.99051	3.33884	2.99216	1.51833	1.29745	1.31286
AcoERF18	2.85236	3.28018	2.5684	3.42711	2.65542	2.43581	3.42488	0.0814737	0.0875409	0.102398	0	0.533467	0.867424	0.311812	0.53687	1.60517	0.344805	0.211773	0	0	0	0	0	0	0	1.42415	0.861317	0.992511
AcoERF19	0.968836	2.40394	1.23156	0	1.68531	0.417876	2.23478	4.22297	2.50247	0.970462	1.33561	0	3.51195	1.79443	1.49882	1.59919	0.673094	0.285329	0.737093	0	1.26893	1.46605	1.76874	2.17916	7.48833	0.296228	0	0.510732
AcoERF20	1.26795	1.32468	1.11054	1.11307	0.792449	1.5377	1.32955	0.645055	0.346685	0.368675	0.183855	0.813352	0.833215	0.397449	0.819548	0.745886	0.69678	0.211194	0	0.758123	0.669527	0.192233	0.265888	0	0.469826	2.77442	0.0724697	0
AcoERF21	3.62197	4.38151	9.22158	3.86224	4.75823	5.12415	10.5447	17.6812	26.6937	22.7652	14.7219	2.84559	3.4249	5.61195	1.79456	8.32322	14.931	38.1981	82.9955	7.44346	21.9244	14.0318	2.21601	4.08779	16.4626	1.79348	12.154	15.3503
AcoERF22	0	0	0	0	0	0	0	0	0	0	0	0	0	0	0	0	0	0	0	0	0	0	0	0	0	0	0	0
AcoERF23	7.14003	5.65302	5.38101	4.73207	3.86561	4.23179	2.83145	2.57188	1.24279	1.13563	1.88037	0.989554	7.38336	4.14305	3.99991	7.67629	3.01203	1.22551	0.339667	5.48479	2.92041	3.48404	2.19735	2.73672	2.13256	1.29078	0.486877	0.814952
AcoERF24	51.6456	36.9405	18.825	34.8993	25.121	17.6241	19.2525	226.049	129.074	30.9178	92.7257	6.71691	6.03881	14.9708	6.11901	8.96552	60.4913	51.179	78.4455	10.0175	34.326	59.8292	11.326	27.7023	55.9441	28.9834	9.24103	11.3755
AcoERF25	1.08609	2.22744	0.836329	1.8427	2.14031	2.13507	1.96605	0.431423	0	0.546522	0.452429	4.16615	10.2056	16.6178	14.6574	6.0575	0.867552	0.355061	0.154444	0	0.434056	0.651816	0.233771	0.164919	0.356705	2.53569	0.37354	0.447591
AcoERF26	0.052087	0	0	0	0	0	0	10.7454	3.75365	2.89638	0.473648	0	0.213602	0	0.0489817	0	0.255714	0	0.828676	3.5451	1.08402	2.63746	40.2025	1.65716	0.591943	0.217808	0	0
AcoERF27	0.167776	0.339727	0.198695	0.0999578	0.100559	0.30667	0.223889	0	0	0.0611654	0	4.08345	2.18758	0.772676	5.70806	0.106605	0.13132	0	0	0	0	0.172651	0	0	0	1.07327	0	0.11907
AcoERF28	0.151569	0.0663373	0.243001	0	0	0	0.185747	45.0973	21.9857	27.524	25.8634	0.109707	0.355535	0	0.38789	1.18263	2.76646	2.45777	134.534	13.3265	43.6097	28.2954	5.87119	4.12659	10.8998	6.35665	18.8585	27.1871
AcoERF29	0.3301	0.177442	0	0	0.518815	0	0.204431	39.9192	20.7959	0.163499	7.47468	0.767529	0.353332	0.596182	0.0657173	0	2.44383	2.75902	0	0	0	0	1.30513	5.20506	2.8073	2.44565	0	0
AcoERF30	3.98066	3.56407	4.82508	3.97216	4.4774	11.6221	10.3724	9.58986	1.4486	1.60008	3.10231	2.2594	1.11282	4.11415	3.27047	1.85772	4.52507	0.698407	0	1.40305	4.36317	0.899199	1.57642	0.947275	0	0	0	0
AcoERF31	52.8534	40.9698	34.2408	38.1958	38.2015	37.4761	36.7797	132.354	102.198	58.6462	58.1782	26.8531	23.9635	33.9398	33.3029	48.6374	43.2831	56.0328	91.5859	46.3236	215.712	255.593	279.883	148.934	318.907	52.1611	39.6817	41.0418
AcoERF32	0	0	0	0	0	0	0	0	0	0	0	0	0	0	0	0	0	0	0	0	0	0	0	0	0	0	0	0
AcoERF33	0	0	0.131586	0	0	0	0	0.103188	0.336735	0.444022	0	0.0550065	0.0420783	0	0.0307884	0.273772	0.0909114	0.109443	0	0	0	0	0	0.139461	0.226257	0.290438	0.555362	1.13457
AcoERF34	1.31555	1.54425	1.95208	1.58976	1.00671	2.43688	1.25598	1.17244	0.888466	0.800485	0.674905	0.842344	1.10355	0.698893	0.19849	6.14115	1.12268	1.24247	4.28075	0.0648022	0.470097	0.527703	0.769964	0.724971	0.626106	0.150592	0.907156	0.735004
AcoERF35	0.164497	0.107657	0.164652	0.168653	0	0	0	3.38837	1.35889	0.426988	0.104043	2.54158	1.59061	0.644766	0.318197	0	0	0.26864	0	0	0.155324	0.35784	0.743756	0	0.296355	0.374431	0	0
AcoERF36	19.4917	13.2257	5.23086	6.2145	10.0819	2.60109	2.45511	74.757	39.2812	12.9912	26.2412	3.95066	3.6093	7.0552	2.03931	4.15075	13.38	8.32195	22.0718	26.7012	34.1662	76.415	15.7247	27.4192	40.5526	35.9875	2.78971	5.04971
AcoERF37	1.48106	3.6892	2.21658	0.709747	1.19807	1.06027	0.908807	1.18081	2.64445	0.454873	0.657573	1.18121	0.966731	0.16452	0.868698	0.437869	0.472315	0.0970906	0	1.75262	1.73365	2.1013	3.93384	1.14724	1.96495	1.44796	0	0
AcoERF38	0	0	0	0	0	0	0	0	0	0	0	0	0	0	0	0	0	0	0.538192	0	0	0	0.433741	0	0	0.34373	0	0
AcoERF39	3.09179	3.43027	2.37178	2.05294	1.37273	1.06466	1.74114	2.48899	1.85969	0.805217	0.899548	4.16858	2.0019	0.386123	0.677534	29.5128	6.48245	2.62207	0	0.312786	4.48761	2.34933	0.70251	0.270357	0.127732	0.78168	0.72768	0.611559
AcoERF40	0	0	0	0	0	0	0	0.180369	0	0	0	0	0	0.833294	0.861581	0	0	0	0	0	0	0	0	0	0	0	0	0
AcoERF41	9.99604	11.5688	10.0116	5.92761	7.92476	8.348	13.1007	104.815	66.4895	9.0948	19.7872	3.11054	3.4179	4.3913	2.86266	2.91632	12.0307	7.54898	27.9642	4.52735	21.0342	49.7322	10.4202	19.9342	39.5797	7.55021	3.53704	4.88037
AcoERF42	52.3744	70.9384	105.393	45.0707	49.3212	61.9081	83.5486	305.084	212.438	274.672	287.121	37.6228	40.9197	35.9461	61.2203	38.8874	155.323	77.3512	88.9606	714.531	589.703	380.016	645.099	304.377	102.653	171.155	19.9276	18.1101
AcoERF43	0	0	0	0	0	0	0	0	0	0	0	0	0	0	0	0	0	0	0	0	0	0	0	0	0	0	0	0
AcoERF44	1.29926	1.92507	1.93437	1.96719	2.32686	1.01621	2.06639	31.6355	27.9656	20.7036	20.5356	4.4555	4.78284	2.86878	2.53509	1.22728	2.67025	3.69547	6.97699	4.12033	44.2193	22.9546	43.5112	19.9761	20.2093	1.49798	1.86901	2.31074
AcoERF45	5.67749	6.61097	7.27259	4.48386	3.9662	3.2285	4.57011	29.9484	36.2518	26.1946	22.6334	0.682044	0.770213	1.2724	1.09637	1.27347	12.3648	13.4579	5.8812	2.58448	4.5093	3.52528	4.25709	2.86072	0.95156	2.25879	2.0865	3.24568
AcoERF46	15.4848	12.8618	7.92911	5.89639	8.39366	2.93984	3.80062	26.7503	26.0165	1.98841	6.17474	1.51791	2.8789	4.68892	2.48675	1.67006	13.0939	6.29651	10.217	3.40394	27.5459	103.419	6.30534	25.3853	48.8397	11.6343	1.35537	2.58354
AcoERF47	13.5716	22.023	11.5106	4.08024	6.24937	5.44506	10.2906	445.664	452.663	113.174	105.076	3.48006	5.74303	3.90443	2.3473	4.95743	43.75	45.8581	24.2056	63.9582	156.369	286.338	245.517	105.685	130.666	15.4329	5.80038	10.2782
AcoERF48	0.0369943	0	0.121549	0	0	0	0.103895	0.523866	1.14946	1.71939	1.23236	0	0.0474082	0.160562	1.36844	0.0387322	0.0901842	0.10924	0.290531	0	0.0988729	0.10813	0	0	0.265003	3.54945	0.636813	0.465971
AcoERF49	0	0	0	0	0	0	0	0.0560543	0	0	0	0	0	0	0.0966564	0	0	0	0	0	0	0	0	0	0	0	0.109811	0.174699
AcoERF50	0	0	0	0	0	0	0	0	0	0	0	0	0	0	0	0	0	0	0	0	0	0	0	0	0	0.0759098	0	0
AcoERF51	6.68132	11.6569	9.33598	14.4143	18.6016	32.7539	15.3419	27.1336	28.0566	28.4445	27.3911	2.78572	338.361	323.132	211.305	46.6698	69.7046	50.6406	0.231418	2.52896	8.95066	5.4802	4.5135	3.19557	0.178683	0.242518	40.7509	39.9049
AcoERF52	0	0.325405	0.393964	0.80533	0.203054	0.826551	0.732284	7.44995	17.5081	36.6539	27.658	0.276177	0.186236	0.664199	0.343642	0.37293	0.384188	1.95459	0	0.281754	1.11209	1.28957	4.09513	5.36865	1.91365	2.72722	0.668273	2.07861
AcoERF53	0	0	0	0	0	0	0	0	0	0	0	0	0	0	0	0	0.118753	0	0	0	0	0	0	0	0	0.377634	0	0
AcoERF54	0.0436127	0	0.293241	0	0.146441	0	0.236995	0	0.404017	0.718137	1.61776	0.174996	2.49904	2.90908	0.371194	0.0567076	0	0.132339	14.5593	0.266037	0.233075	0.13007	0.712895	0.276485	0.741041	0.19265	1.1141	0.782508
AcoERF55	6.71304	6.21434	3.16294	5.4054	3.35441	7.23605	1.1917	16.0225	13.7178	6.31312	8.55541	2.05428	2.09902	4.69872	3.59409	2.22492	2.32855	2.59925	2.75513	2.37683	7.12406	5.78246	1.13975	1.70577	1.67699	2.55527	2.85921	2.91504
AcoERF56	2.63498	0.615653	0	1.152	0.995787	0.167775	0	9.26642	6.42589	0	1.86968	0.116143	0	0.208894	0	0.568016	0.767188	12.7957	3.99959	0	0	0	0	0	0	0.730831	0.229966	0.193221
AcoERF57	1.37614	2.44974	6.93461	4.353	6.35009	4.06679	8.99092	0	0.29273	0.229962	0	9.14657	12.8682	5.83959	5.66444	1.58389	0.115158	0.553072	0.36699	0	0.141969	0	0.325645	0	0	0.635329	0.249943	0.213628
AcoERF58	8.18436	4.74448	4.01394	4.6375	3.00813	4.45363	6.98146	0.698097	1.01233	1.20482	0.588423	38.7034	12.8899	2.69951	2.44511	0.152677	0.607517	2.44515	0.329584	0	0.197953	0.888057	12.8699	3.31459	1.00891	1.44496	0.179454	0
AcoERF59	0.083989	0.297687	0	0.263597	0.13265	0	0	0	0	0	0.0843263	7.01781	0.620005	0.173353	0.218988	0	0.183873	0	0.447981	0	0	0	0.176652	0.131992	0	0.0476631	0.341539	0.436174
AcoERF60	1.45106	1.49632	2.01602	1.28019	0.129375	0.515548	1.85744	14.2002	21.681	13.7594	9.08883	2.9407	3.1113	3.81112	6.11135	3.6996	5.60008	11.4192	151.464	9.06423	6.83125	4.61171	9.39849	5.20901	13.9457	6.28494	29.7816	31.8236
AcoERF61	0	0.138555	0	0	0	0	0.128872	0	0	0	0	0.148041	0.301173	2.619	3.50909	0.506603	0	0	0.370017	0	0	0.348123	0	0	0.0912117	0	0.407152	0
AcoERF62	0.282955	0.0709728	0	0	0	0	0	1.90865	3.83636	0	0	0	0	0	0	0	0.260572	0.624088	0	1.10314	0	0	0	0.224312	1.02692	1.50926	0	0
AcoERF63	0	0.0371474	0	0	0	0.106228	0	0.150588	0.583748	0.130706	0	0	0.0336297	0.506055	0.484535	0.023422	0	0.0865506	1.01186	0.0742405	0.148511	1.94169	4.72523	0.437996	0.642535	0.205838	0.140875	0
AcoERF64	2.38581	0.518793	0.240211	0.985338	0.249367	0	0.190987	26.2778	21.2055	0.155663	2.13822	0	0.0818524	0.309439	0.283256	0	0.336304	0.812897	0.269639	0	0.20351	0	0.162806	0	0.518445	0.115634	0.183627	0
AcoERF65	242.877	248.282	275.758	251.102	262.213	363.263	290.227	259.397	284.221	290.343	266.613	277.05	198.646	191.153	225.924	223.394	195.182	209.351	225.918	564.085	423.871	464.926	513.625	521.777	1267.85	211.933	188.976	208.422
AcoERF66	0.0405954	0	0	0	0	0.150622	0	0	0	0	0	0	0	0	0	0.058193	0	0	0	0	0	0.363351	0	0	0	1.92707	0	0
AcoERF67	7.11239	11.7344	11.908	11.9364	13.718	8.45563	15.7419	3.62281	3.33002	1.90957	3.32219	4.54605	11.9577	7.14793	3.38741	2.16598	2.89921	1.33112	0	1.75673	2.13505	3.43141	0.466992	0.994201	0.693706	1.08184	0	0
AcoERF68	3.07217	1.33856	0.202871	0.410914	0.830324	0.848617	0.283621	56.6478	45.2949	0.4288	9.00908	0.423345	0.218393	8.92252	0.192928	0.823564	9.18377	35.8933	4.62344	0.243783	0.442513	1.69339	0	0.506279	0.957311	3.81889	0.525286	0.815294
AcoERF69	0.881606	2.42293	6.28922	4.27759	6.61408	3.18901	5.07304	10.107	36.3368	11.5831	7.15122	0	0	0.93797	1.95899	6.69238	1.45319	90.6305	15.9136	5.61385	0.583891	1.40309	1.2439	0.225906	0.131479	2.40858	18.5261	23.0466
AcoERF70	0.0329386	0	0.211504	0.106396	0.209229	0	0	0	0.247074	0.297708	0.29489	0.0461571	0.077457	0.536201	0.171978	0.0892569	0	0	0	0	0	0	0	0	0	0.620355	0	0
AcoERF71	0.0936604	0.141668	0	0	0	0	0	0	0	0	0	0	0	0	0	0	0	0	0	0	0	0	0	0	0	0	0	0
AcoERF72	0	0	0	0	0	0	0	0	0	0	0	0	0	0	0	0	0	0	0	0	0	0	0	0	0	0	0	0
AcoERF73	0	0	0.120358	0	0	0	0	0	0	0	0	0	0	0	0	0	0	0	0	0	0	0	0	0	0	0	0	0
AcoERF74	0	0.0648654	0.232892	0	0	0	0	0.206099	0.22529	0.337841	0.660275	0.120265	0.929256	1.21384	0.0729521	0	0	0	3.94029	0.370711	0.173999	0	0.659994	0	0.742887	0	0	0
