# Supplementary material for: Genome-wide identification and expression analysis of the ERF transcription factor family in pineapple (Ananas comosus (L.) Merr.)
Source: PeerJ. 2020 Sep 22;8:e10014. doi: 10.7717/peerj.10014 (PMC7518161; doi:10.7717/peerj.10014)
Supplement: Supplemental Information 10 [file peerj-08-10014-s010.xlsx]

## Sheet: Sheet1
Table S7. Cis-elememts in AcoERF promoters
Gene ID	Gene Name	ABRE	AuxRR-core	CGTCA-motif	DRE core	ERE	GARE-motif	LTR	MBS	TC-rich	TCA-element	TGA-element	W -box	WUN-motif
Aco000059	AcoERF1			1		3		1						1
Aco000347	AcoERF2	4		4				1	1				1	2
Aco000576	AcoERF3	5	1	1		1			2		2	2		1
Aco001157	AcoERF4	2		1		3			1	2	1			1
Aco001190	AcoERF5	9		1				1					2
Aco001318	AcoERF6	4	1	3	1	2		1	1				1	2
Aco001600	AcoERF7	7		6	2	1		2			1		1
Aco001844	AcoERF8	4		2	2	3		1				1
Aco001898	AcoERF9					3			2	1	2		1
Aco002425	AcoERF10	1						1			1		3
Aco002673	AcoERF11	7			1	3					1	1	1	2
Aco002699	AcoERF12	4				1					1	2	1
Aco002824	AcoERF13	6		2		1		1		1	2
Aco003196	AcoERF14	4			1			1	1				3
Aco003376	AcoERF15	6		1		1				1		1	1
Aco003993	AcoERF16	3				3					1
Aco004208	AcoERF17	6		1		3		1
Aco004886	AcoERF18	5		2					1			2	1
Aco005324	AcoERF19	1				1			2	1			1	3
Aco005327	AcoERF20			1		1		2		1		1	2
Aco005509	AcoERF21	4		1		2		3	1		1			1
Aco006004	AcoERF22	3						2	1			1
Aco006074	AcoERF23	1				1
Aco006567	AcoERF24	3								1			2	1
Aco006716	AcoERF25	4	1	2		3		1		1		2	3
Aco006883	AcoERF26	12		5								1	1
Aco007650	AcoERF27	3		2		3			2			3
Aco008323	AcoERF28	11		1				1					1
Aco008968	AcoERF29			3					2			1		3
Aco008998	AcoERF30	12		6	1	2					2			1
Aco009511	AcoERF31	1		3		1			1			1		2
Aco009985	AcoERF32	2		1	1	4		1			2
Aco009986	AcoERF33	4		2		7		1			1
Aco010173	AcoERF34	8		2				3	1		1		1
Aco010430	AcoERF35	8		2		5			7				1
Aco010545	AcoERF36	16		3	1			1		1	2	2	2
Aco010600	AcoERF37	5		1			1		1	1			1	1
Aco010602	AcoERF38	9		4		1			4					1
Aco010738	AcoERF39	2		1		1		1	1	1
Aco010908	AcoERF40					4	1	2			1	1	2	1
Aco011669	AcoERF41	10		5	1		1	1	1	1			1
Aco012157	AcoERF42	2		3					1
Aco012243	AcoERF43	5		3	1	2	1		1		2
Aco012562	AcoERF44	7		1		2		1			1	1	2	2
Aco012835	AcoERF45					1				1		1	1
Aco012858	AcoERF46	5		1	2	3	1	1		1	1		1	1
Aco012860	AcoERF47	5		4	1	1	1	1						1
Aco013629	AcoERF48	1		2		2	1				1
Aco013781	AcoERF49	3				4		1			2	1	1	1
Aco013795	AcoERF50	3				1		1
Aco014268	AcoERF51	7		2					1				1	1
Aco015162	AcoERF52	2				2					1			1
Aco016197	AcoERF53	2			1	2							2	2
Aco016213	AcoERF54			5		3				1	1
Aco016346	AcoERF55	1		2	1	4
Aco016696	AcoERF56	7			1	3					1			1
Aco016891	AcoERF57	1		1		3	1			2			3
Aco016902	AcoERF58		1	1		2			1	2				1
Aco017794	AcoERF59	4		2							1		1
Aco017803	AcoERF60	3		1		6
Aco017940	AcoERF61	5		1		10
Aco018023	AcoERF62		1	1		1		1					5	1
Aco018224	AcoERF63	3		3	1								2	1
Aco018980	AcoERF64	1		2	1			2	1		1			1
Aco021063	AcoERF65	4		1		3		4			1	1		1
Aco021629	AcoERF66	1				2			1	2				2
Aco022052	AcoERF67	2		1		4	1			1	2
Aco022517	AcoERF68	3		1		3					1	3		2
Aco022651	AcoERF69			1		1			4					2
Aco023605	AcoERF70	3				1	1					1		1
Aco024332	AcoERF71	3				5	1	1		2			1
Aco026785	AcoERF72	1		1		7								1
Aco029929	AcoERF73					7				1				1
Aco031075	AcoERF74	2		1		25		2	1				1	2
