# Supplementary material for: Genome-wide identification and expression analysis of the ERF transcription factor family in pineapple (Ananas comosus (L.) Merr.)
Source: PeerJ. 2020 Sep 22;8:e10014. doi: 10.7717/peerj.10014 (PMC7518161; doi:10.7717/peerj.10014)
Supplement: Supplemental Information 11 [file peerj-08-10014-s011.xlsx]

## Sheet: Sheet1
Table S8. The expression profiles of the pineapple ERF genes after cold treatment
		Cold treatment (4℃)
Tissue	Gene name	Time after treatment (h)
		0	standard ERRPR	P-value	6	standard ERRPR	P-value	12	standard ERRPR	P-value	24	standard ERRPR	P-value	48	standard ERRPR	P-value
root	AcoERF7	1.00549	0.0726358	1	1.95118	0.0512982	0.000442649	3.58345	0.200572	0.000268903	0.518052	0.0148019	0.00276848	7.24964	0.409846	0.00011504
	AcoERF13	1.0002	0.01408	1	0.140396	0.00354048	4.86855e-07	0.26423	0.05624	0.000221791	0.734862	0.108481	0.0723259	2.21757	0.141084	0.00101083
	AcoERF16	1.00247	0.0491193	1	3.30956	0.346206	0.00273397	5.66836	0.377908	0.000255526	0.526585	0.0165421	0.000781418	1.02207	0.0329066	0.756924
	AcoERF36	1.00212	0.0461769	1	13.9338	0.261477	1.06347e-06	62.5406	0.382935	9.25739e-09	50.6896	0.711123	2.53514e-07	107.642	0.861519	2.56945e-08
	AcoERF42	1.00158	0.0402571	1	1.5443	0.0217395	0.000289192	0.943216	0.104638	0.630157	0.00256083	0.000183056	1.56517e-05	0.00457449	0.000258034	1.57785e-05
	AcoERF45	1.00363	0.059944	1	1.10291	0.033141	0.220817	2.16462	0.228945	0.00801124	18.7288	0.35683	1.03898e-06	36.0892	0.38039	8.69985e-08
	AcoERF60	1.01046	0.104996	1	0.543874	0.148814	0.0625139	0.852655	0.0592195	0.260647	0.402535	0.0076693	0.00446554	0.714404	0.0228629	0.0511059
	AcoERF65	1.00923	0.0962937	1	1.45455	0.0755954	0.0220123	1.21328	0.125731	0.267069	0.0133507	0.000615188	0.000494869	0.00475468	0.000605172	0.000475356
	AcoERF67	1.00154	0.0387692	1	0.669557	0.023827	0.24106	0.614358	0.0438331	0.00270554	19.0323	0.306748	5.17771e-07	42.1297	0.352046	3.29798e-08
leaf	AcoERF7	1.0058	0.0774104	1	6.14852	0.530741	0.00066121	9.46443	0.590195	0.000142411	9.84027	0.604765	0.000131894	1.77026	0.147791	0.0101675
	AcoERF13	1.00596	0.0762298	1	2.39958	0.246829	0.00571237	12.462	0.547046	3.19239e-05	194.913	0.780017	1.60103e-09	0.756866	0.0237089	0.0355182
	AcoERF16	1.00017	0.0129392	1	1.315	0.078565	0.0167617	1.33153	0.108151	0.03832	0.212483	0.00806353	8.40034e-07	0.358846	0.0264701	2.63571e-05
	AcoERF36	1.0011	0.0329282	1	15.0059	0.348192	2.32408e-06	14.8722	0.433142	5.7333e-06	9.65037	0.193689	1.59189e-06	49.3019	0.630544	1.75011e-07
	AcoERF42	1.00065	0.0257467	1	2.86355	0.157091	0.000304908	2.05974	0.0838105	0.000269381	18.3892	0.426698	2.18266e-06	0.806134	0.0513786	0.0276636
	AcoERF45	1.00045	0.0209923	1	0.306682	0.0173792	1.41415e-05	8.47738	0.118929	4.07663e-07	52.108	0.432727	3.09671e-08	37.1022	0.308113	3.21134e-08
	AcoERF60	1.0031	0.056604	1	0.0627785	0.0111702	8.29464e-05	2.4393	0.341641	0.124849	9.46509	0.772989	0.000399663	0.374777	0.00648293	1.02902e-06
	AcoERF65	1.00294	0.0545151	1	0.891508	0.0662631	0.263862	1.56145	0.0702259	0.185546	0.721513	0.0674274	0.0315035	0.00330151	0.000368733	7.75242e-05
	AcoERF67	1.01618	0.123357	1	0.109035	0.0136875	0.00186374	8.62995	0.560571	0.000335618	35.5121	0.45418	2.07623e-07	1.61373	0.011224	2.15884e-08
