# Supplementary material for: Genome-wide identification and expression analysis of the ERF transcription factor family in pineapple (Ananas comosus (L.) Merr.)
Source: PeerJ. 2020 Sep 22;8:e10014. doi: 10.7717/peerj.10014 (PMC7518161; doi:10.7717/peerj.10014)
Supplement: Supplemental Information 12 [file peerj-08-10014-s012.xlsx]

## Sheet: Sheet1
Table S9. The expression profiles of the pineapple ERF genes after drought treatment
		Drought treatment (mannitol)
Tissue	Gene name	Time after treatment (h)
		0	standard ERRPR	P-value	6	standard ERRPR	P-value	12	standard ERRPR	P-value	24	standard ERRPR	P-value	48	standard ERRPR	P-value
root	AcoERF7	1.00549	0.0726358	1	0.633197	0.0851616	0.0292105	0.845381	0.0469773	0.137838	0.139498	0.0445201	0.000527481	0.500072	0.00600337	0.0022705
	AcoERF13	1.0002	0.01408	1	0.326385	0.108662	0.00354688	0.614845	0.137197	0.049107	0.391808	0.0467923	0.000239307	1.36595	0.133214	0.0524222
	AcoERF16	1.00247	0.0491193	1	1.57957	0.0566395	0.367473	0.955028	0.126091	0.743587	0.092466	0.0403362	0.000138258	0.442743	0.163916	0.0307602
	AcoERF36	1.00212	0.0461769	1	5.35617	0.298683	0.000134932	6.05696	0.219838	2.3096e-05	3.24225	0.0487746	4.82011e-06	11.6709	0.374428	9.30373e-06
	AcoERF42	1.00158	0.0402571	1	0.482166	0.135778	0.0214356	0.345021	0.0201381	0.000128507	0.0480364	0.00239719	1.89704e-05	0.177856	0.0272402	7.10911e-05
	AcoERF45	1.00363	0.059944	1	1.93803	0.167014	0.00622976	4.79444	0.352774	0.000449327	16.2698	0.377519	2.34857e-06	24.1995	0.313071	2.137e-07
	AcoERF60	1.01046	0.104996	1	1.05828	0.078662	0.733929	1.38816	0.0644817	0.0374595	0.158071	0.0213313	0.00135211	1.35809	0.153295	0.134678
	AcoERF65	1.00923	0.0962937	1	1.82371	0.0372602	0.101755	0.888089	0.0340583	0.301243	0.0534865	0.01205	0.000596207	0.356228	0.0191955	0.0026543
	AcoERF67	1.00154	0.0387692	1	1.75717	0.193823	0.0187333	3.21069	0.256229	0.00103895	6.97355	0.524712	0.000343509	18.7522	0.753823	1.93841e-05
leaf	AcoERF7	1.0058	0.0774104	1	1.5922	0.0420686	0.00264637	1.57463	0.13832	0.0229893	0.117357	0.00939292	0.000338494	4.40055	0.576543	0.0042973
	AcoERF13	1.00596	0.0762298	1	6.1535	0.34786	0.000133162	4.25545	0.271153	0.000322384	0.664368	0.00406791	0.0110346	0.165562	0.0175569	0.000425526
	AcoERF16	1.00017	0.0129392	1	0.601553	0.0640622	0.00365594	0.964632	0.0296419	0.333596	0.127944	0.0119814	9.99805e-07	0.132328	0.0196571	3.22862e-06
	AcoERF36	1.0011	0.0329282	1	24.0964	0.543866	1.85181e-06	80.8245	0.493256	8.82411e-09	3.70349	0.143809	5.22524e-05	1.90987	0.0950617	0.00083199
	AcoERF42	1.00065	0.0257467	1	4.00218	0.0928655	6.332e-06	3.05053	0.125049	8.7998e-05	0.595069	0.0335792	0.000662048	1.0805	0.195637	0.70644
	AcoERF45	1.00045	0.0209923	1	18.3093	0.523136	4.99222e-06	28.2047	0.804644	4.57172e-06	8.45467	0.686715	0.0004095	6.90092	0.834434	0.00211298
	AcoERF60	1.0031	0.056604	1	4.14337	0.29644	0.000481787	21.3265	0.621276	5.29368e-06	1.03123	0.091065	0.806029	0.689476	0.0089198	0.00542319
	AcoERF65	1.00294	0.0545151	1	1.14795	0.088517	0.235513	0.685137	0.0191873	0.00533157	0.106361	0.00751436	8.94156e-05	0.245829	0.0100772	0.000480109
	AcoERF67	1.01618	0.123357	1	27.2267	0.383277	3.33601e-07	44.7439	0.627711	2.74446e-07	7.47217	0.778722	0.00121162	5.94313	0.438393	0.000414132
